# Supplementary material
Source: PubMed Central journal article supplement (PMC4157102)
Supplement: NIHMS616772-supplement-1.pdf [file NIHMS616772-supplement-1.pdf]

Supplemental Material

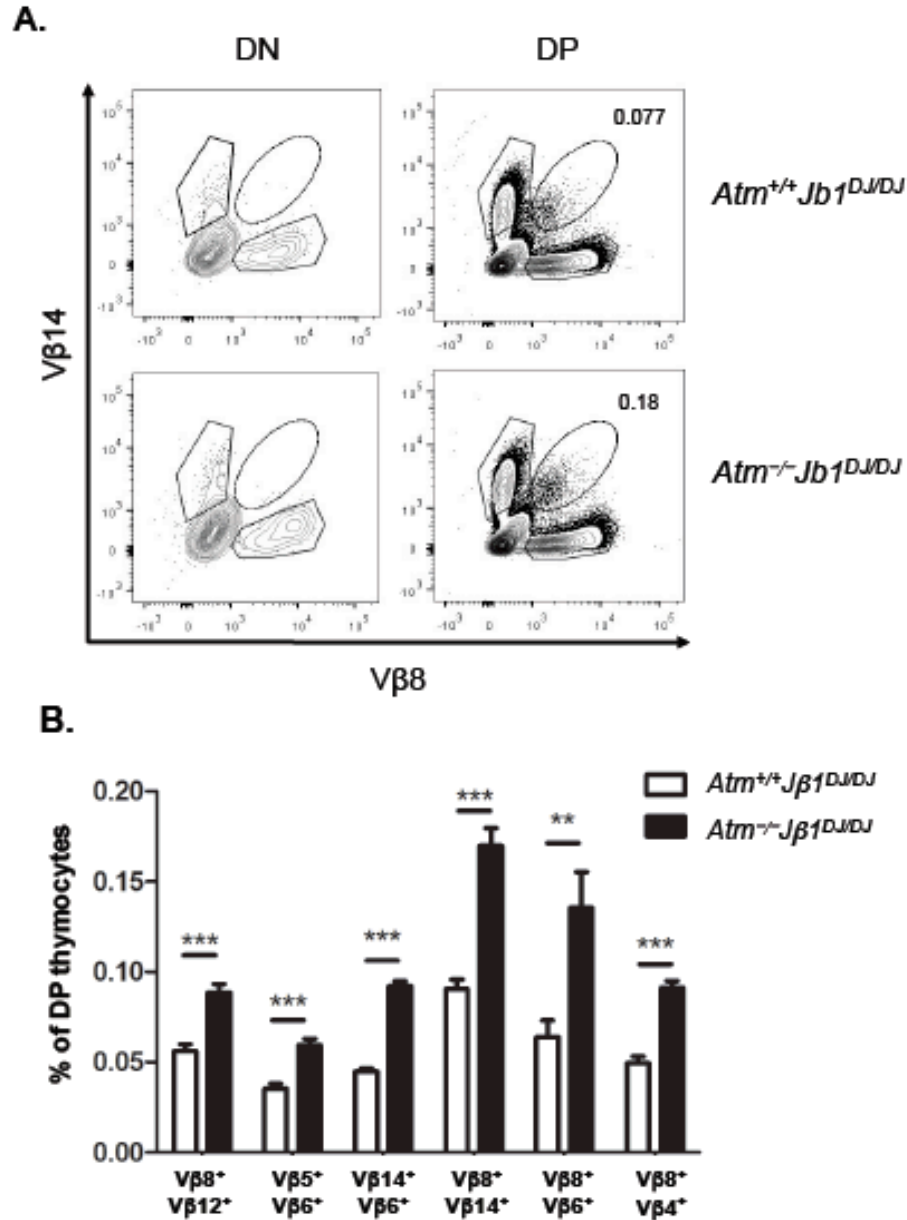

**SUPPLEMENTAL FIGURE 1.** Flow Cytometry Analysis of Intracellular TCR $\beta$  Allelic Inclusion in DN and DP Thymocytes. **A**, Representative flow cytometry analysis of intracellular expression of V $\beta$ 14 and V $\beta$ 8 expression in DN or DP thymocytes isolated from *Atm*<sup>+/+</sup>*Jb1*<sup>DJ/DJ</sup> or *Atm*<sup>-/-</sup>*Jb1*<sup>DJ/DJ</sup> mice. The circle gates indicate where cells expressing equivalent high levels of both V $\beta$ 14 and V $\beta$ 8 should be visualized. DN thymocytes lacked detectable populations of V $\beta$ 14<sup>+</sup>V $\beta$ 8<sup>+</sup> cells, whereas DP thymocytes contained populations that comprised the indicated percentage of DP cells. **B**, Graph depicting the average frequencies of DP thymocytes from *Atm*<sup>+/+</sup>*Jb1*<sup>DJ/DJ</sup> or *Atm*<sup>-/-</sup>*Jb1*<sup>DJ/DJ</sup> mice that express each indicated combination of V $\beta$  chains in their cytoplasm. Data are from two independent experiments conducted on a total of seven *Atm*<sup>+/+</sup>*Jb1*<sup>DJ/DJ</sup> and eight *Atm*<sup>-/-</sup>*Jb1*<sup>DJ/DJ</sup> littermate mice. Error bars indicate the SEM.
